# Supplementary material for: The induction and function of the anti-inflammatory fate of TH17 cells
Source: PubMed Central journal article supplement (PMC7335205; doi:10.1038/s41467-020-17097-5), 2020-07-03
Supplement: 41467_2020_17097_MOESM1_ESM.pdf [file 41467_2020_17097_MOESM1_ESM.pdf]

# Supplementary Information

## The induction and function of the anti-inflammatory fate of T<sub>H</sub>17 cells

Xu, H., Agaloti, T. *et al.*, 2020

**Supplementary Figure 1: Evaluation of T<sub>H</sub>17-specific IL-10 depletion mouse model**

**Supplementary Figure 2: No immune abnormality observed in the periphery**

**Supplementary Figure 3: T<sub>H</sub>17 cells express higher levels of IL-10R compared to T<sub>H</sub>1 cells**

**Supplementary Figure 4: TGF- $\beta$  promotes IL-10 production in mature T<sub>H</sub>17 cells**

**Supplementary Figure 5: Tgfbr2 is required for T<sub>H</sub>17 cells to produce IL-10**

**Supplementary Figure 6: Tgfbr2 is required for T<sub>H</sub>17 cells to produce IL-10 during intestinal inflammation**

**Supplementary Figure 7: TIF1 $\gamma$  is dispensable for IL-10 production in T<sub>H</sub>17 cells**

**Supplementary Figure 8: Smad4 is required for T<sub>H</sub>17 cells to produce IL-10**

**Supplementary Figure 9: Smad3 is important for IL-10 production in T<sub>H</sub>17 cells**

**Supplementary Figure 10: Human intestinal T<sub>H</sub>17 cells produce IL-10; and TGF- $\beta$  further promotes IL-10 expression**

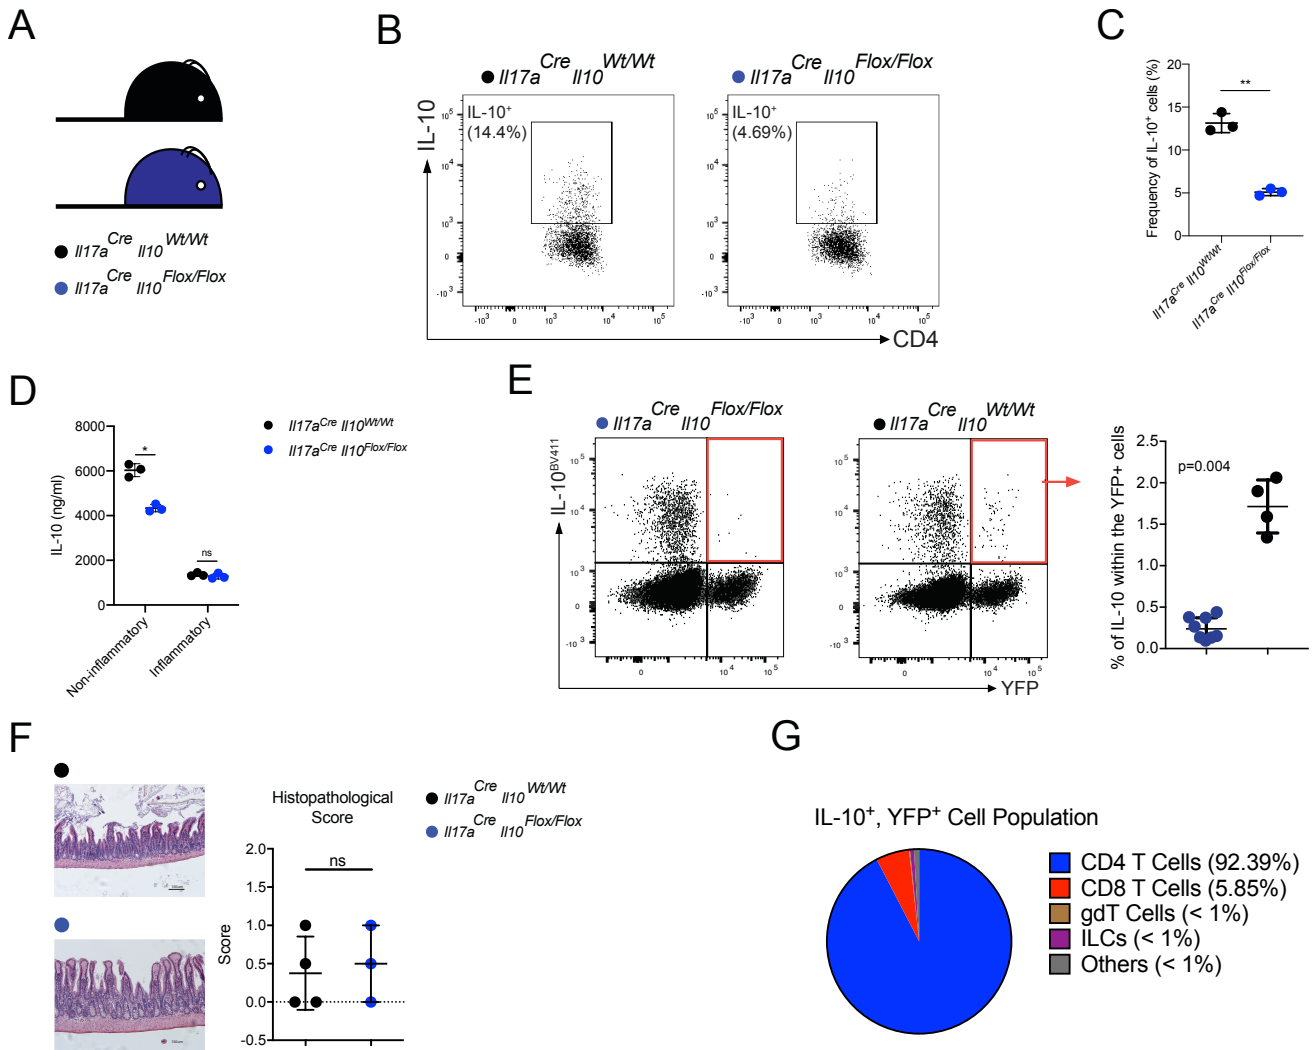

**Supplementary Figure 1. Evaluation of  $T_H17$ -specific IL-10 depletion mouse model.** A. Mouse strains employed to deplete IL-10 production in  $T_H17$  cells. B. Flow cytometric analysis of intestinal lymphocytes isolated from  $Il17a^{Cre} Il10^{Wt/Wt}$  as well as  $Il17a^{Cre} Il10^{FloxFlox}$  mice after anti-CD3 treatment. Intracellular staining for IL-10 was then performed. A pre-gate on  $T_H17$  cells ( $CD4^+$ ,  $TCR\beta^+$ ,  $IL-17A^+$ ) was applied. C. Statistical analysis of frequencies of IL-10<sup>+</sup> cells among  $T_H17$  cells. Each dot represents one mouse ( $n_{wild\ type}=3$ ,  $n_{KO}=3$ ). Mean  $\pm$  S.D.; \*\* $P < 0.01$  by Welch's t-test. D. ELISA measurement of IL-10 after *in vitro* culture. Naive  $CD4^+$  T cells were isolated from the spleens of  $Il17a^{Cre} Il10^{Wt/Wt}$  as well as  $Il17a^{Cre} Il10^{FloxFlox}$  mice and were cultured under non-inflammatory (IL-6 + TGF- $\beta$ ) or inflammatory (IL-6 + IL-23 + IL-1 $\beta$ )  $T_H17$  conditions. IL-10 in the supernatant was measured by ELISA on day 5. Each dot represents one replicate ( $n=3$ ). Mean  $\pm$  S.D.; ns, not significant; \* $P < 0.05$  by Mann-Whitney U test. E. Flow cytometric analysis of *in vitro* cultured  $T_H17$  cells. Naive  $CD4^+$  T cells were isolated from the spleens of  $Il17a^{Cre} Il10^{Wt/Wt}$  as well as  $Il17a^{Cre} Il10^{FloxFlox}$  mice and were cultured under non-inflammatory (IL-6 + TGF- $\beta$ )  $T_H17$  conditions. Cells were re-stimulated and intracellularly stained for IL-10 on Day 5. On the right the statistics of IL-10<sup>+</sup> cells within YFP<sup>+</sup> cells are reported. Each dot represents one separate  $T_H17$  cell culture ( $n_{wild\ type}=4$ ,  $n_{KO}=8$ ) obtained from pooled naïve T cells coming from two mice. Mean  $\pm$  S.D.; Mann-Whitney U-test. F. Representative histological pictures of H&E stained small intestines under steady states. One representative experiment of two is shown. Each dot represents one mouse ( $n_{wild\ type}=4$ ,  $n_{KO}=3$ ). Mean  $\pm$  S.D.; ns, not significant by Welch's t-test. G. Frequencies of different IL-10-producing lymphocyte populations that are derived from IL-17A producers. Intestinal lymphocytes were harvested from steady state *Fate*<sup>+</sup> mice (Gagliani et al., *Nature* 523, 224-224, 2015). Different IL-10-producing immune cell populations that have activated IL-17A<sup>CRE</sup> (indicated by YFP expression) were analyzed by flow cytometry.

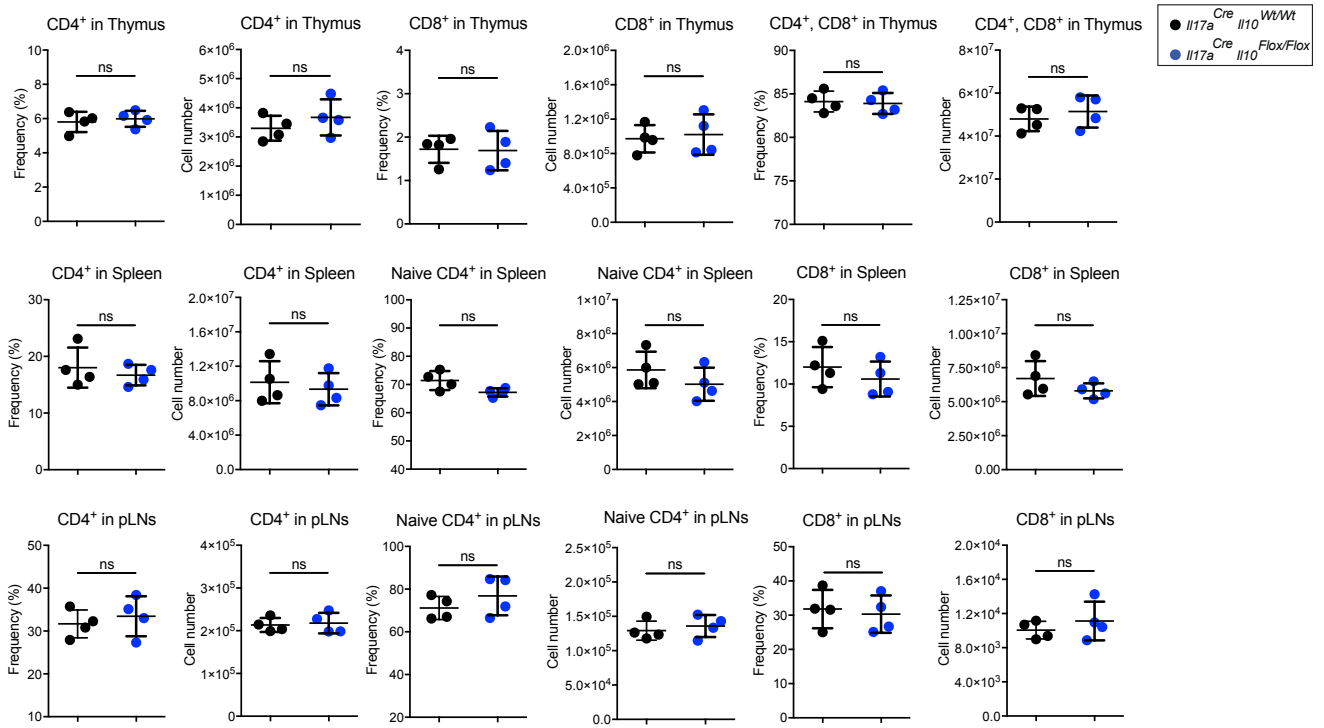

**Supplementary Figure 2. No immune abnormality observed in the periphery.** Frequencies and cell numbers of different T cell subsets in different immune organs. Lymphocytes from thymus, spleen and peripheral lymph nodes (pLNs) were harvested from steady state *Il17a<sup>Cre</sup> Il10<sup>Flox/Flox</sup>* mice as well as their littermate wild-type control mice. Different T cell subsets were then analyzed by flow cytometry. Each dot represents one mouse ( $n_{wild\ type}=4$ ,  $n_{KO}=4$ ). Mean  $\pm$  S.D.; ns, not significant by Mean  $\pm$  S.D.; ns, not significant by Mann-Whitney *U* test.

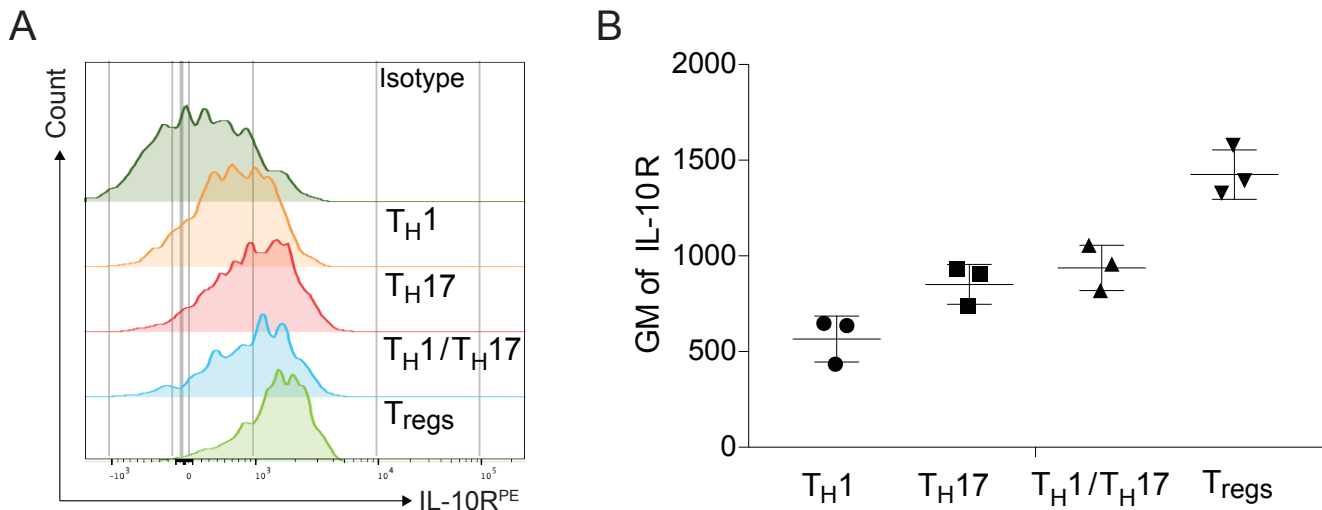

**Supplementary Fig. 3 T<sub>H</sub>17 cells express higher levels of IL-10R compared to T<sub>H</sub>1 cells.** A. Histograms showing the expression of IL-10R for T<sub>H</sub>1 cells (defined as CD4<sup>+</sup> CD44<sup>+</sup> IFN- $\gamma$ <sup>Katushka<sup>+</sup></sup> IL-17a<sup>eGFP<sup>-</sup></sup>), T<sub>H</sub>17 cells (defined as CD4<sup>+</sup> CD44<sup>+</sup> IFN- $\gamma$ <sup>Katushka<sup>-</sup></sup> IL-17a<sup>eGFP<sup>+</sup></sup>), T<sub>H</sub>1/T<sub>H</sub>17 cells (defined as CD4<sup>+</sup> CD44<sup>+</sup> IFN- $\gamma$ <sup>Katushka<sup>+</sup></sup> IL-17a<sup>eGFP<sup>+</sup></sup>) and Tregs (defined as CD4<sup>+</sup> Foxp3<sup>RFP<sup>+</sup></sup> IFN- $\gamma$ <sup>Katushka<sup>-</sup></sup> IL-17a<sup>eGFP<sup>-</sup></sup>) isolated from the intestinal lamina propria of a representative Foxp3<sup>RFP</sup> IL-17a<sup>eGFP</sup> IFN- $\gamma$ <sup>Katushka</sup> reporter mouse injected with anti-CD3 mAb. B. Geometric Mean (GM) values of IL-10R from different CD4 T cell subsets. Each dot represents one mouse ( $n=3$ ). Mean  $\pm$  S.D.

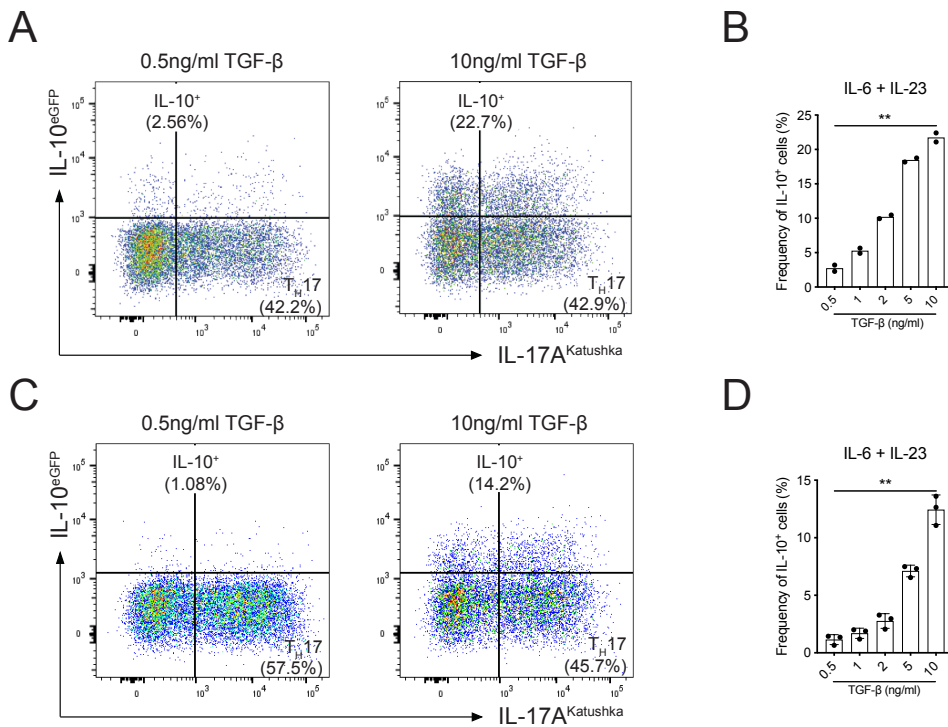

**Supplementary Fig. 4 TGF- $\beta$  promotes IL-10 production in mature T<sub>H</sub>17 cells.** A, C. T<sub>H</sub>17 cells generated *in vitro* under either TGF- $\beta$  condition (IL-6 + IL-23 + TGF- $\beta$ ) (A) or IL-1 $\beta$  condition (IL-6 + IL-23 + IL-1 $\beta$ ) (C) were purified and then re-activated with IL-6, IL-23 as well as different amounts of TGF- $\beta$ . Cells in the above dot plots are pre-gated on viable CD4<sup>+</sup> T cells. B, D. Statistical analysis of the frequencies of IL-10<sup>+</sup> cells in A, C respectively across different TGF- $\beta$  conditions. \*\*P < 0.01, by ordinary one-way ANOVA.

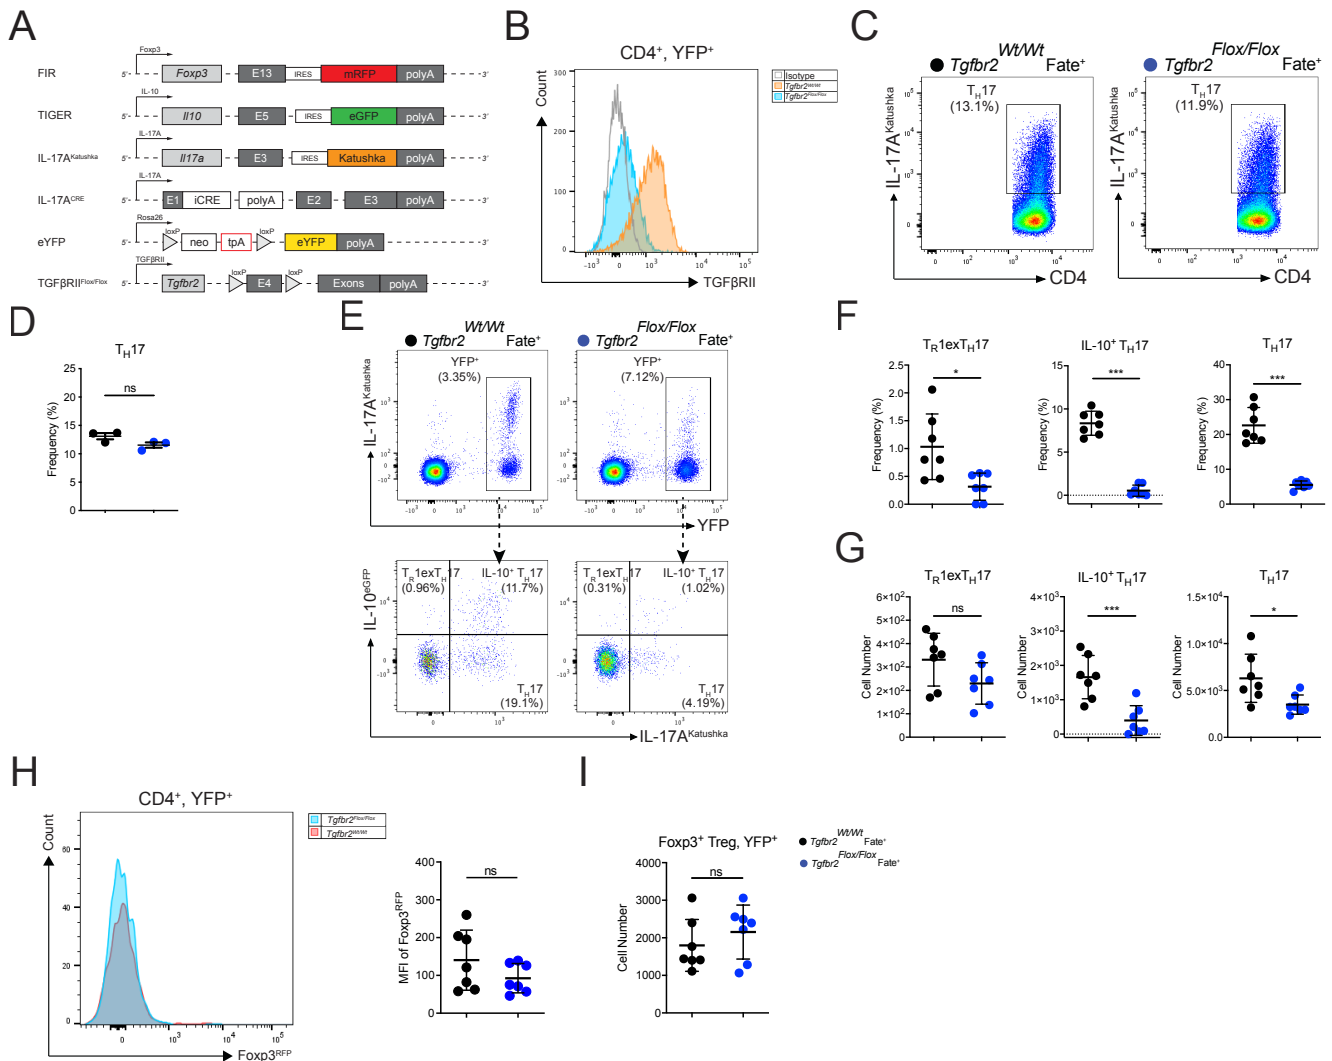

**Supplementary Fig. 5 Tgfr2 is required for TH17 cells to produce IL-10.** A. Constructs contained in Tgfr2<sup>fl/fl</sup> Fate<sup>+</sup> mouse line. B. Flow cytometry analysis of TGF- $\beta$ RII expression in intestinal CD4<sup>+</sup> T cells expressing YFP (indicating CRE activation). One representative of two independent experiments is shown. C. Flow cytometry analysis of naive CD4<sup>+</sup> T cells polarized under TH17 condition *in vitro*. Cells are pre-gated on viable CD4<sup>+</sup> T cells. D. Frequency of TH17 cells shown in C. One representative of two independent experiments is shown. Mean  $\pm$  S.D.; ns, not significant by Welch's t-test. E. Flow cytometry analysis of small intestinal CD4<sup>+</sup> T cells under steady state. Top panel is pre-gated on CD4<sup>+</sup> Fcpx3<sup>-</sup> T cells and bottom panel on CD4<sup>+</sup> Fcpx3<sup>-</sup> YFP<sup>+</sup> T cells. The cell populations indicated on the FACS dot plots are identified by different combination of reporter expression (T<sub>R</sub>1exTH17: IL-10<sup>eGFP+</sup> YFP<sup>+</sup> IL17a<sup>Kata-</sup>; IL-10<sup>+</sup> TH17: IL-10<sup>eGFP+</sup> YFP<sup>+</sup> IL17a<sup>Kata+</sup>; TH17: IL-10<sup>eGFP-</sup> YFP<sup>+</sup> IL17a<sup>Kata+</sup>). F, G. Frequencies (F) and numbers (G) of T<sub>R</sub>1<sup>exTH17</sup>, IL-10<sup>+</sup> TH17 and TH17 cells. Data are pooled from three independent experiments. Each dot represents one mouse ( $n_{wild\ type}=7$ ,  $n_{KO}=7$ ). Mean  $\pm$  S.D.; ns, not significant; \*P < 0.05, \*\*\*P < 0.001 by Mann-Whitney U test. H. Left, Flow cytometric analysis of the Fcpx3 expression level among the intestinal YFP<sup>+</sup> CD4<sup>+</sup> T cells under steady state conditions. Fcpx3 expression was determined by RFP reporter fluorescence. A pre-gate on YFP<sup>+</sup> CD4<sup>+</sup> T cells is applied. Right panel shows the statistical analysis of Fcpx3 Mean Fluorescence Intensity (MFI) among YFP<sup>+</sup> CD4<sup>+</sup> T cells. I. Numbers of YFP<sup>+</sup> Fcpx3<sup>+</sup> Treg cells in the small intestine under steady state conditions in the two indicated mouse lines. Each dot represents one mouse ( $n_{wild\ type}=7$ ,  $n_{KO}=7$ ). Mean  $\pm$  S.D.; ns, not significant by Mann-Whitney U test.

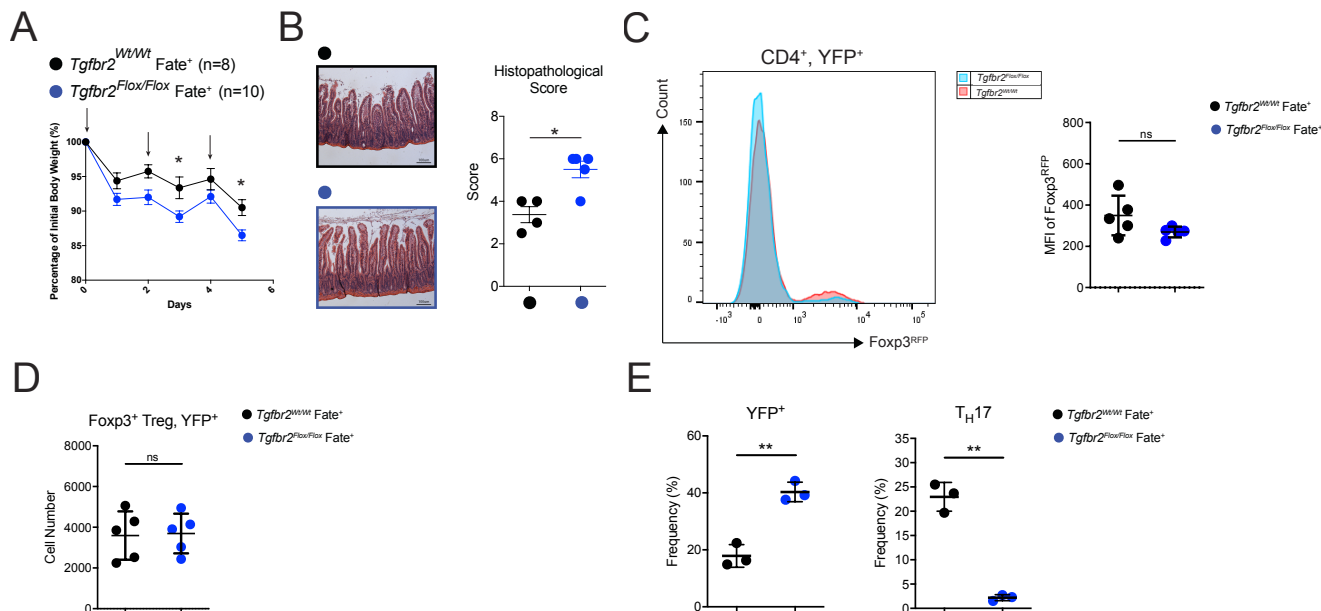

**Supplementary Fig. 6 Tgfb2 is required for T<sub>H</sub>17 cells to produce IL-10 during intestinal inflammation.**

A. Percentages of initial body weight of mice after anti-CD3 mAb treatment. The arrows indicate the injection of anti-CD3 mAb. Data are cumulative of three independent experiments. Mean  $\pm$  SEM.; \*P < 0.05, by 2-way ANOVA with Bonferroni's post-test. B. Representative histological pictures of H&E stained small intestines after anti-CD3 treatment. Statistical analysis is representative of two experiments. Each dot represents one mouse ( $n_{wild\ type}=4$ ,  $n_{KO}=5$ ). Mean  $\pm$  SEM, \*P < 0.05 by Mann-Whitney U test. C. Left, flow cytometric analysis of Foxp3 expression among YFP<sup>+</sup> CD4<sup>+</sup> T cells in the small intestine during anti-CD3 mAb-induced intestinal inflammation. Foxp3 expression was determined by RFP reporter fluorescence. A pre-gate on YFP<sup>+</sup> CD4<sup>+</sup> T cells is applied. Right panel shows the statistical analysis of Foxp3 Mean Fluorescence Intensity (MFI) among YFP<sup>+</sup> CD4<sup>+</sup> T cells between the two indicated mouse lines. Each dot represents one mouse ( $n_{wild\ type}=5$ ,  $n_{KO}=5$ ). D. Numbers of YFP<sup>+</sup> Foxp3<sup>+</sup> Treg cells in the small intestine in the two indicated mouse lines. Each dot represents one mouse ( $n_{wild\ type}=5$ ,  $n_{KO}=5$ ). Mean  $\pm$  S.D.; ns, not significant by Mann-Whitney U test. E. As part of Fig.4G, here it is reported the statistical analysis of YFP<sup>+</sup> and T<sub>H</sub>17 cells after CD4<sup>+</sup> T cells transfer. CD4<sup>+</sup> T cells were isolated from the indicated mouse lines. Each dot represents one mouse ( $n_{wild\ type}=3$ ,  $n_{KO}=3$ ). Mean  $\pm$  S.D.; \*\*P < 0.01 by Welch's t-test.

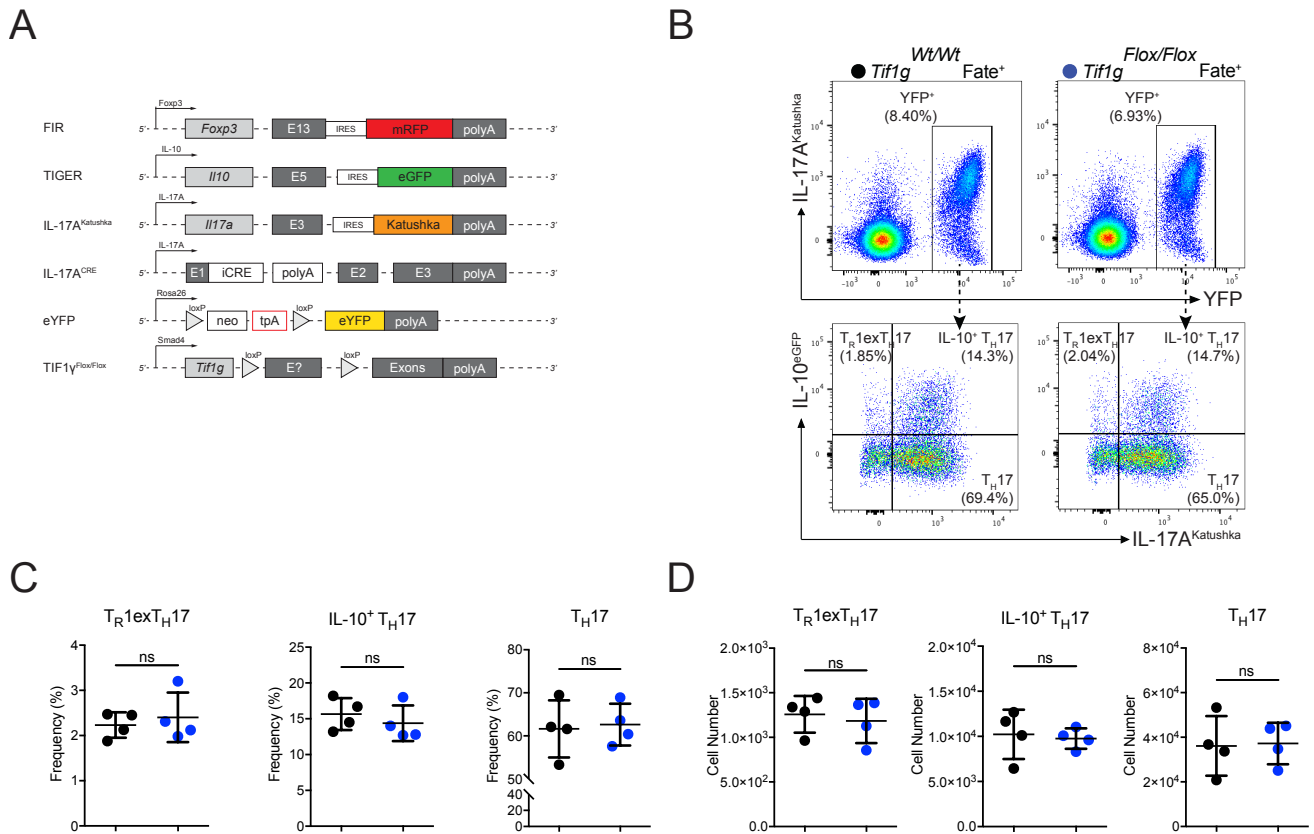

**Supplementary Fig. 7 TIF1 $\gamma$  is dispensable for IL-10 production in T<sub>H</sub>17 cells.** A. Constructs contained in *Tif1g<sup>fl/fl</sup>* *Fate<sup>+</sup>* mice. B. Flow cytometry analysis of small intestinal CD4<sup>+</sup> T cells after anti-CD3-induced intestinal inflammation. Top panel, pre-gated on *Foxp3<sup>-</sup>* CD4<sup>+</sup> T cells; bottom panel, pre-gated on YFP<sup>+</sup> *Foxp3<sup>-</sup>* CD4<sup>+</sup> T cells. The populations indicated on the FACS dot plots are identified by different combination of reporter expression (T<sub>R</sub>1exT<sub>H</sub>17: IL-10<sup>eGFP+</sup> YFP<sup>+</sup> IL17a<sup>Kata-</sup>; IL-10<sup>+</sup>T<sub>H</sub>17: IL-10<sup>eGFP+</sup> YFP<sup>+</sup> IL17a<sup>Kata+</sup>; T<sub>H</sub>17: IL-10<sup>eGFP-</sup> YFP<sup>+</sup> IL17a<sup>Kata+</sup>). C, D. Frequencies (C) and numbers (D) of T<sub>R</sub>1exT<sub>H</sub>17, IL-10<sup>+</sup> T<sub>H</sub>17 and T<sub>H</sub>17 cells. One representative of three independent experiments is shown. Each dot represents one mouse ( $n_{wild\ type}=4$ ,  $n_{KO}=4$ ). Mean  $\pm$  S.D.; ns, not significant by Mann-Whitney U test.



**A**

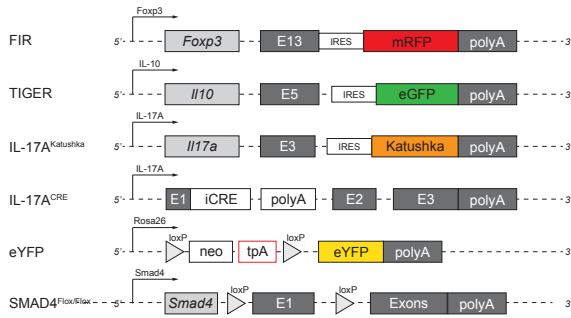

**B**

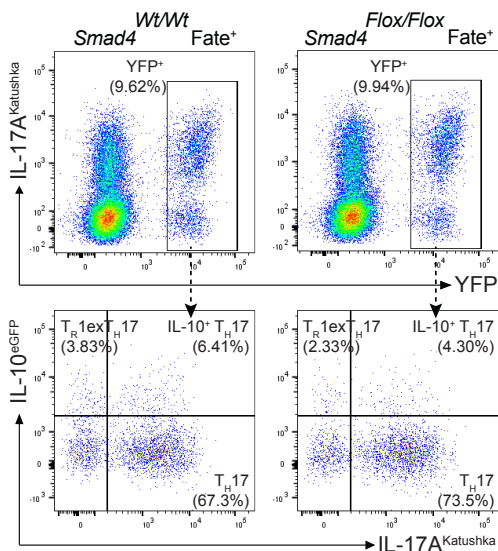

**C**

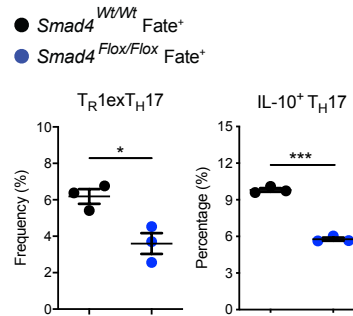

**Supplementary Fig. 8 Smad4 is required for T<sub>H</sub>17 cells to produce IL-10.** A. Constructs contained in *Smad4*<sup>fl/fl</sup> Fate<sup>+</sup> mice. B. Flow cytometric analysis of *in vitro* cultured naive CD4<sup>+</sup> T cells. Cells were polarized under T<sub>H</sub>17 condition for 5 days. Top panel, pre-gated on Foxp3<sup>-</sup> CD4<sup>+</sup> T cells; bottom panel, pre-gated on YFP<sup>+</sup> Foxp3<sup>-</sup> CD4<sup>+</sup> T cells. The populations indicated on the FACS dot plots are identified by different combination of reporter expression (T<sub>R</sub>1exT<sub>H</sub>17: IL-10<sup>eGFP+</sup> YFP<sup>+</sup> IL17a<sup>Kata-</sup>; IL-10<sup>+</sup>T<sub>H</sub>17: IL-10<sup>eGFP+</sup> YFP<sup>+</sup> IL17a<sup>Kata+</sup>; T<sub>H</sub>17: IL-10<sup>eGFP-</sup> YFP<sup>+</sup> IL17a<sup>Kata+</sup>). B. Statistical analysis of T<sub>R</sub>1exT<sub>H</sub>17, IL-10<sup>+</sup>T<sub>H</sub>17 and T<sub>H</sub>17 cells. Data are representative of one out of three experiments. Each dot represents one mouse ( $n_{wild\ type}=3$ ,  $n_{KO}=3$ ). Mean ± S.D.; \*P < 0.05, \*\*\*P < 0.001 by Welch's t-test.

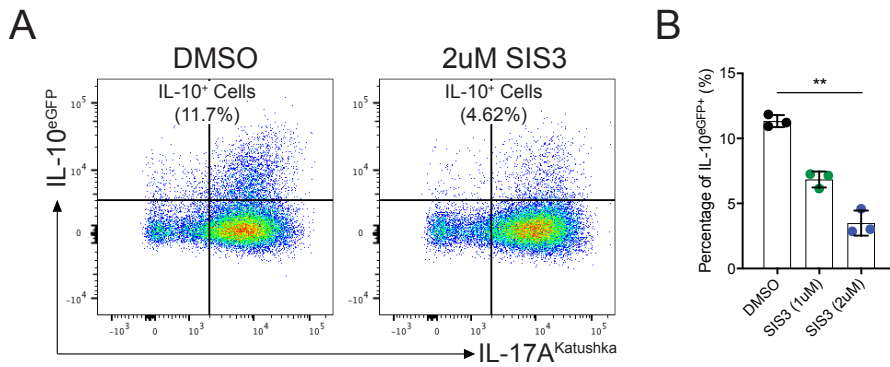

**Supplementary Fig. 9 Smad3 is important for IL-10 production in T<sub>H</sub>17 cells.** *In vitro* differentiated T<sub>H</sub>17 cells were purified and cultured in the presence 2ng/ml TGF- $\beta$  together with DMSO or different amount of SIS3. A. Representative flow cytometry analysis of DMSO and 2uM SIS3 conditions. Cells were pre-gated on viable CD4<sup>+</sup> T cells. Expression of IL-10<sup>eGFP</sup> was detected by reporter fluorescence. B. Statistical analysis of the frequencies of IL-10<sup>+</sup> cells across different conditions. Each dot represents one replicate ( $n=3$ ). Mean  $\pm$  S.D.; \*\*P < 0.01 by Kruskal-Wallis test.

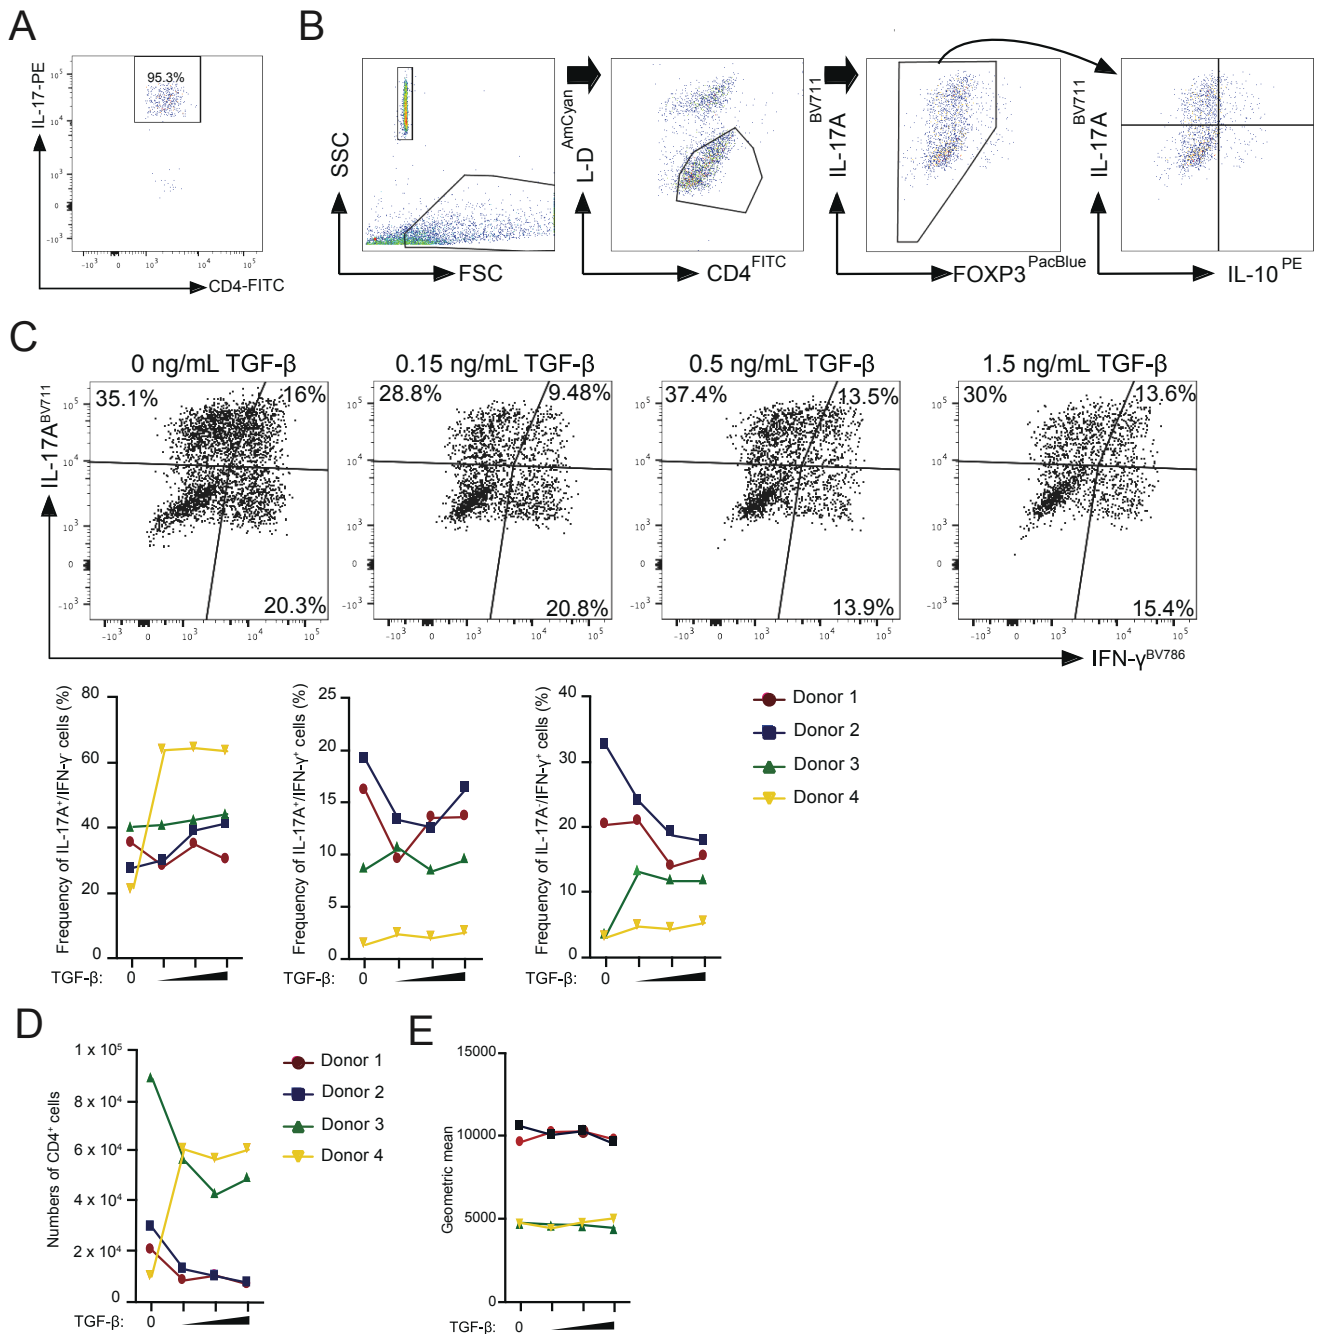

**Supplementary Fig. 10 Human intestinal T<sub>H</sub>17 cells produce IL-10 and TGF-β further promotes IL-10 expression.** A. The dot plot shows the purity of the sorted CD4<sup>+</sup> IL17A<sup>+</sup> cells corresponding to blood donor 1 shown in Fig. 7. B. Gating strategy of human T<sub>H</sub>17 cells isolated from PBMCs of one representative healthy human donor. This strategy applies to the data shown here and in Figure 7B. C. Dot plots of PBMC-sorted T<sub>H</sub>17 cells from the human blood, stimulated and cultured under increasing TGF-β1 concentrations for 5 days and stained for IL-17A and IFN-γ. The graphs below show the percentages of IL-17A<sup>+</sup>, IL-17A<sup>+</sup>/IFN-γ<sup>+</sup>, and IFN-γ<sup>+</sup> cells from four different blood donors. Each colored line represents one donor ( $n=4$ ). D. Absolute total numbers of living CD4<sup>+</sup> T cells corresponding to (C). E. Foxp3 expression (MFI) among the *in vitro* cultured human T<sub>H</sub>17 cells shown in Fig. 7, in the presence of increasing TGF-β concentrations.

**Supplementary Table 1: Table of Antibodies**

| <b>Name</b>                                | <b>Clone</b>     | <b>Company</b>              | <b>Cat. Number</b> | <b>Use</b>       |
|--------------------------------------------|------------------|-----------------------------|--------------------|------------------|
| Anti-Smad3<br>(phosphoS423+S425)           | EP823Y           | Abcam                       | ab52903            | WB, PLA          |
| Anti-Smad3                                 | -                | Abcam                       | ab52903            | ChIP             |
| Smad4 Monoclonal<br>Antibody               | 4G1C6            | ThermoFischer<br>Scientific | MA5-15682          | WB, PLA,<br>ChIP |
| Anti-Smad4                                 | EP618Y           | Abcam                       | ab40759            | ChIP             |
| Anti-acetyl Histone H4                     | -                | Merck                       | 06-866             | WB               |
| Pac Blue anti-mouse<br>CD4                 | GK1.5            | Biolegend                   | 100428             | FACS             |
| Alexa Fluor® 700 anti-<br>mouse CD4        | RM4-5            | Biolegend                   | 100536             | FACS             |
| PE.Cy5 anti-mouse<br>CD8                   | 53-6.7           | Biolegend                   | 100722             | FACS             |
| PE.Cy7 anti-mouse<br>NK1.1                 | PK136            | Biolegend                   | 108713             | FACS             |
| PE anti-mouse CD19                         | 6D5              | Biolegend                   | 115508             | FACS             |
| PE.Cy7 anti-mouse<br>CD11b                 | M1/70            | Biolegend                   | 101216             | FACS             |
| PE.Cy7 anti-mouse<br>CD11c                 | N418             | Biolegend                   | 117318             | FACS             |
| PE.Cy7 anti-mouse<br>γδTCR                 | GL3              | Biolegend                   | 118123             | FACS             |
| PE anti-mouse<br>TGFβRII                   | -                | R&D Systems                 | FAB532P            | FACS             |
| BV421 anti-mouse IL-<br>17A                | TC11-<br>18H10.1 | Biolegend                   | 506925             | FACS             |
| PE anti-mouse IFN-γ                        | XMG1.2           | Biolegend                   | 554412             | FACS             |
| FITC anti-human CD4                        | OKT4             | Biolegend                   | 317408             | FACS             |
| Alexa Fluor® 700 anti-<br>human CD45RA     | HI100            | Biolegend                   | 304120             | FACS             |
| PE/Cy7 anti-human<br>CD127                 | 019D5            | Biolegend                   | 351320             | FACS             |
| Brilliant Violet 650™<br>anti-human CD25   | BC96             | Biolegend                   | 302633             | FACS             |
| Brilliant Violet 711™<br>anti-human IL-17A | BL168            | Biolegend                   | 512328             | FACS             |
| PE anti-human IL-10                        | JES3-<br>19F1    | Biolegend                   | 506804             | FACS             |
| Pacific Blue™ anti-<br>mouse CD4           | RM4-5            | Biolegend                   | 100531             | FACS             |

WB: Western Blot

PLA: Proximity Ligation Assay

ChIP: Chromatin Immunoprecipitation

FACS: Fluorescent Activation Cell Sorting

**Supplementary Table 2: Table of primers**

| <b>Name</b>                      | <b>Sequence</b>                                       | <b>Amplicon size</b> | <b>Use</b> |
|----------------------------------|-------------------------------------------------------|----------------------|------------|
| <i>Il10pr Fw</i>                 | 5' gttgcttctgctgttggaacg 3'                           | 1447bp               | PCR, CL    |
| <i>Il10pr Rev</i>                | 5' gtagacctcctgttcttggtccc 3'                         |                      | PCR, CL    |
| <i>Il10pr-pGL2 Fw</i>            | 5' gcgtcgtagctcgaggttgcttctgctgttggaacg 3'            | 1477bp               | PCR, CL    |
| <i>Il10pr-pGL2 Rev</i>           | 5' cggaatgccaaagctttagacctcctgttcttggtccc 3'          |                      | PCR, CL    |
| <i>Smad3 Fw</i>                  | 5' atgctgcatcctgcccttcac 3'                           | 1278bp               | PCR, CL    |
| <i>Smad3 Rev</i>                 | 5' ctaagacacactggaacagcggatg 3'                       |                      | PCR, CL    |
| <i>Smad3-pT<sub>N</sub>T Fw</i>  | 5' cttttgcactcgagatgctgcatcctgcccttcac 3'             | 1308bp               | PCR, CL    |
| <i>Smad3-pT<sub>N</sub>T Rev</i> | 5' cgggtcgactctagactaagacacactggaacagcggatg 3'        |                      | PCR, CL    |
| <i>Smad4 Fw</i>                  | 5' atggacaatatgtctataacaaatacaccaa 3'                 | 1656bp               | PCR, CL    |
| <i>Smad4 Rev</i>                 | 5' tcagtctaaaggctgtgggtccg 3'                         |                      | PCR, CL    |
| <i>Smad4-pTag2 Fw</i>            | 5' cgggctgcaggaattcatggacaatatgtctataacaaatacaccaa 3' | 1687bp               | PCR, CL    |
| <i>Smad4-pTag2 Rev</i>           | 5' cgtatcgataagcttcagtctaaaggctgtgggtccg 3'           |                      | PCR, CL    |
| <i>Il10A Fw</i>                  | 5' caggttgagtggaggaaacaa 3'                           | 138bp                | ChIP       |
| <i>Il10A Rev</i>                 | 5' ggcagacagctgttctatgt 3'                            |                      | ChIP       |
| <i>Il10B Fw</i>                  | 5' gccaggtacagaatgaaa 3'                              | 173bp                | ChIP       |
| <i>Il10B Rev</i>                 | 5' agctgtgaaggatggagatg 3'                            |                      | ChIP       |
| <i>Il10C Fw</i>                  | 5' agccattatccacgctatta 3'                            | 94bp                 | ChIP       |
| <i>Il10C Rev</i>                 | 5' actggtcggaatgaacttctg 3'                           |                      | ChIP       |
| <i>Gapdh Fw</i>                  | 5' accagggagggtgcagtcc 3'                             | 237bp                | ChIP       |
| <i>Gapdh Rev</i>                 | 5' tcagttcggagcccacaggc 3'                            |                      | ChIP       |

PCR: Polymerase Chain Reaction

CL: Cloning

ChIP: Chromatin Immunoprecipitation
